# Supplementary material
Source: Springer Nature journal article supplement (https://www.springermedizin.de/resource/supplementary/13550_2013_178_MOESM1_ESM.pdf/9687754)

$$\text{normalized AIF} = \frac{c_a(t)}{\bar{c}_a}$$

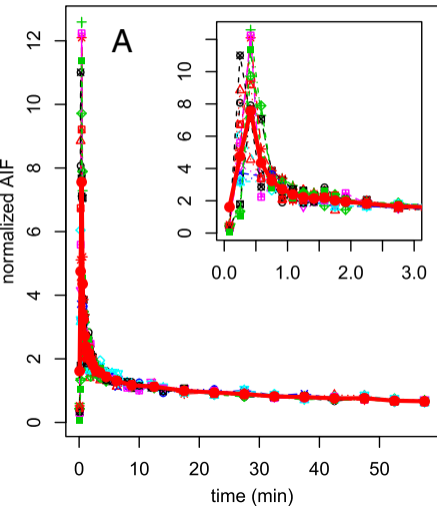

$$\Theta(t) = \frac{\int_0^t c_a(s) ds}{c_a(t)}$$

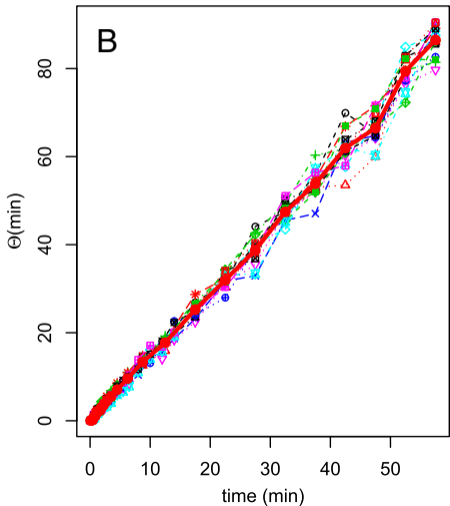

Supplement: MOESM1 [file 9687754]
